# Supplementary material for: ERK5 signalling rescues intestinal epithelial turnover and tumour cell proliferation upon ERK1/2 abrogation
Source: PubMed Central journal article supplement (PMC4873670; doi:10.1038/ncomms11551), 2016-05-17
Supplement: ncomms11551-s1.pdf [file ncomms11551-s1.pdf]

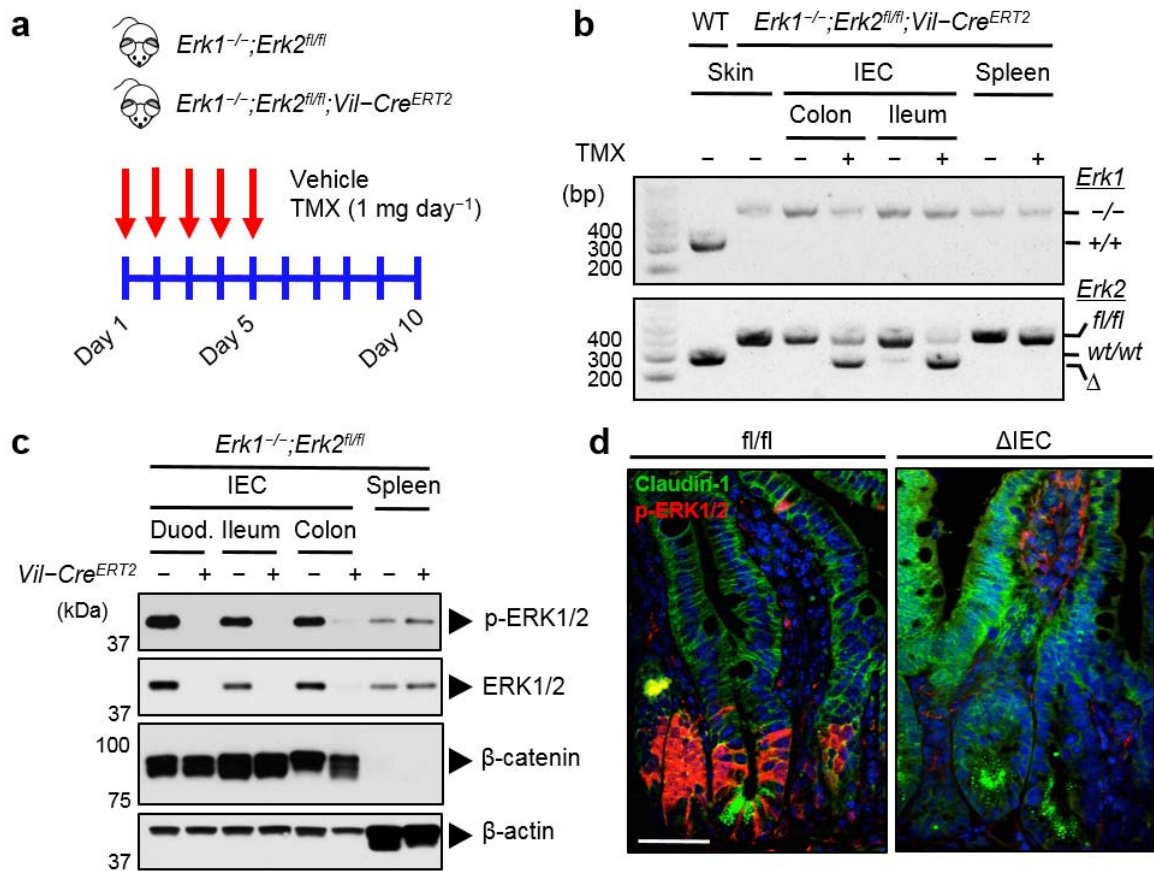

**Supplementary Fig. 1. Validation of genetically engineered *Erk1<sup>-/-</sup>;Erk2<sup>fl/fl</sup>;Vil-Cre<sup>ERT2</sup>* mice.**

**a**, *Erk1<sup>-/-</sup>;Erk2<sup>fl/fl</sup>* (“fl/fl”) or *Erk1<sup>-/-</sup>;Erk2<sup>fl/fl</sup>;Vil-Cre<sup>ERT2</sup>* (“ΔIEC”) mice received 5 consecutive treatments with vehicle or tamoxifen (1 mg day<sup>-1</sup>) by oral gavage, and were killed at day 10. **b**, Genotyping of *Erk1* and *Erk2* in various tissues from WT or *Erk1<sup>-/-</sup>;Erk2<sup>fl/fl</sup>;Vil-Cre<sup>ERT2</sup>* mice treated with vehicle or tamoxifen. **c**, All the *Erk1<sup>-/-</sup>;Erk2<sup>fl/fl</sup>* mice with or without transgene (*Vil-Cre<sup>ERT2</sup>*) were treated as in **a**. Immunoblotting for indicated proteins with lysates of IECs (isolated from duodenum, ileum or colon) or splenocytes. β-catenin, an IEC marker. β-actin, loading control. **d**, Immunofluorescent staining for p-ERK1/2 and Claudin-1, an IEC marker, with small intestinal sections prepared from fl/fl and ΔIEC mice. Scale bar = 100 μm.

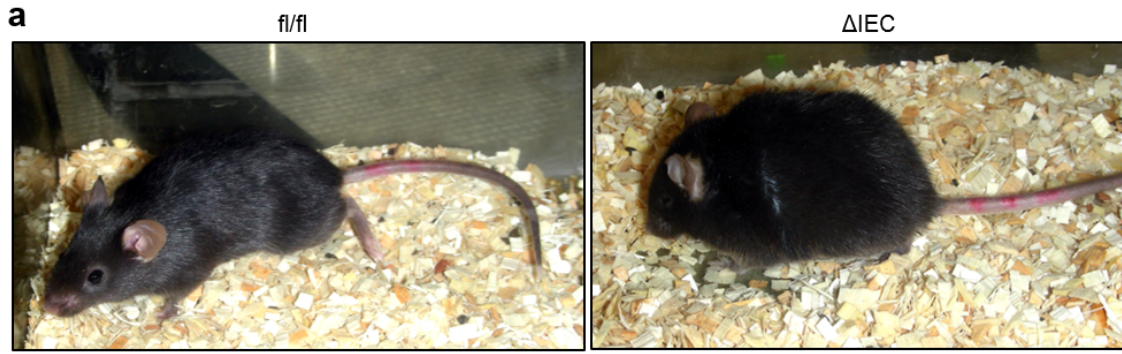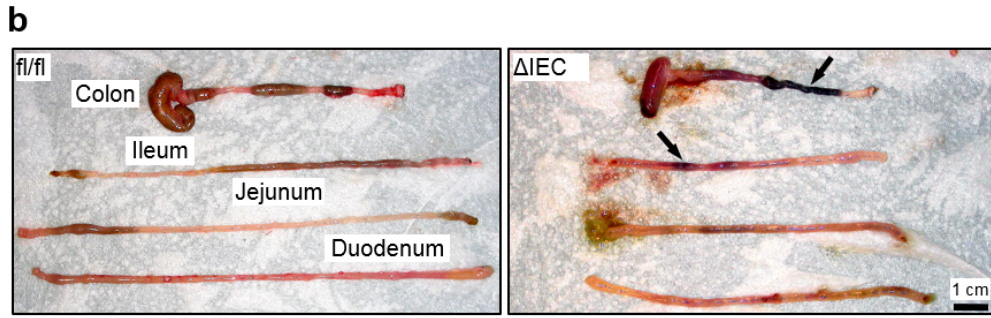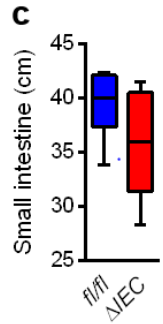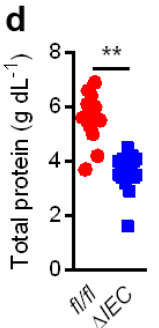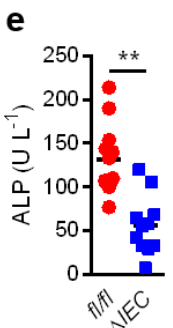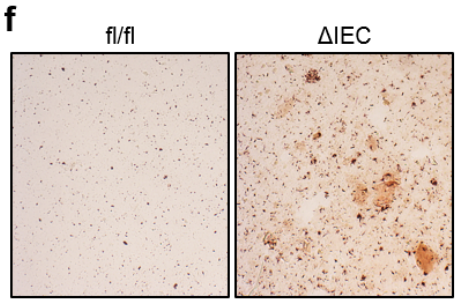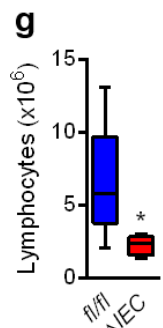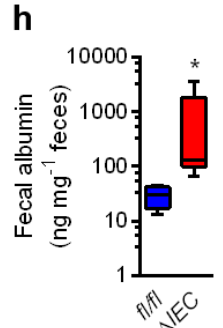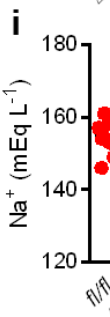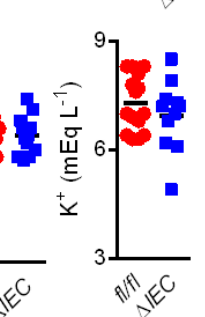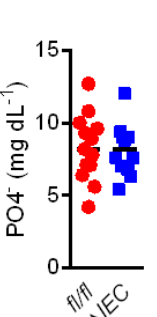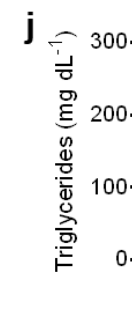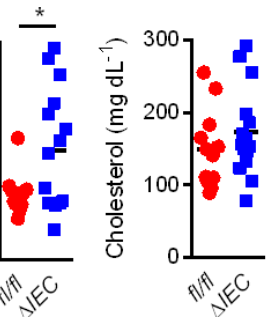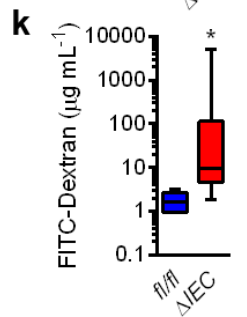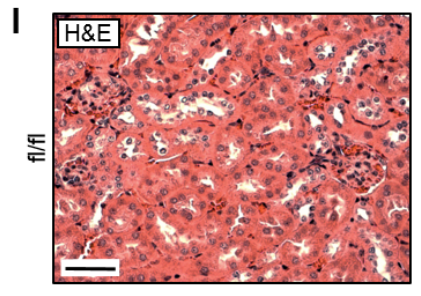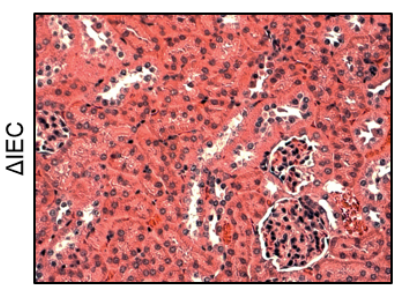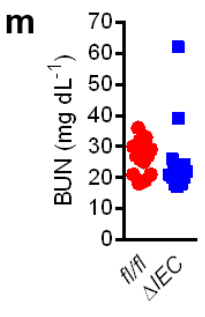

**Supplementary Fig. 2. Intestinal and metabolic consequences in *Erk1/2* <sup>$\Delta$ IEC</sup> mice.**

Comparisons between fl/fl and  $\Delta$ IEC mice littermates performed at day 10 of follow-up after tamoxifen treatment. **a**, Moribund phenotype of  $\Delta$ IEC mice compared with fl/fl littermates. Representative examples are shown. **b**, Macroscopic appearance of the small intestine and colon. Sites of macroscopic bleeding in the ileum and colon are indicated by arrows. **c**, Length of the small intestine of fl/fl (n=6) and  $\Delta$ IEC (n=5) mice. **d, e**, Serum was analyzed for: total protein levels (**d**), and alkaline phosphatase (ALP) levels (**e**). **f**, Fecal smears stained with Oil red O (representative examples from each group). **g**, Lymphocyte counts in peripheral blood samples of fl/fl (n=12) and  $\Delta$ IEC (n=10) mice. **h**, Albumin levels measured in stool samples of fl/fl (n=4) and  $\Delta$ IEC (n=6) mice. **i**, Electrolyte levels measured in serum. **j**, Triglyceride and cholesterol levels measured in serum. **k**, Gut barrier assay by oral administration of FITC-Dextran (FD-4) and measurement of FD-4 in peripheral blood of fl/fl (n=7) and  $\Delta$ IEC (n=11) mice. **l**, Histological features of the renal parenchyma in fl/fl and  $\Delta$ IEC mice. Representative results are shown. Scale bar = 100  $\mu$ m. **m**, Blood urea nitrogen (BUN) levels in fl/fl and  $\Delta$ IEC mice. Data are represented as box-and-whiskers plots (**c, g-h, k**), or scatter plots with mean (**d-e, i-j, m**). \*P<0.05 and \*\*P<0.001 by Student's t test.

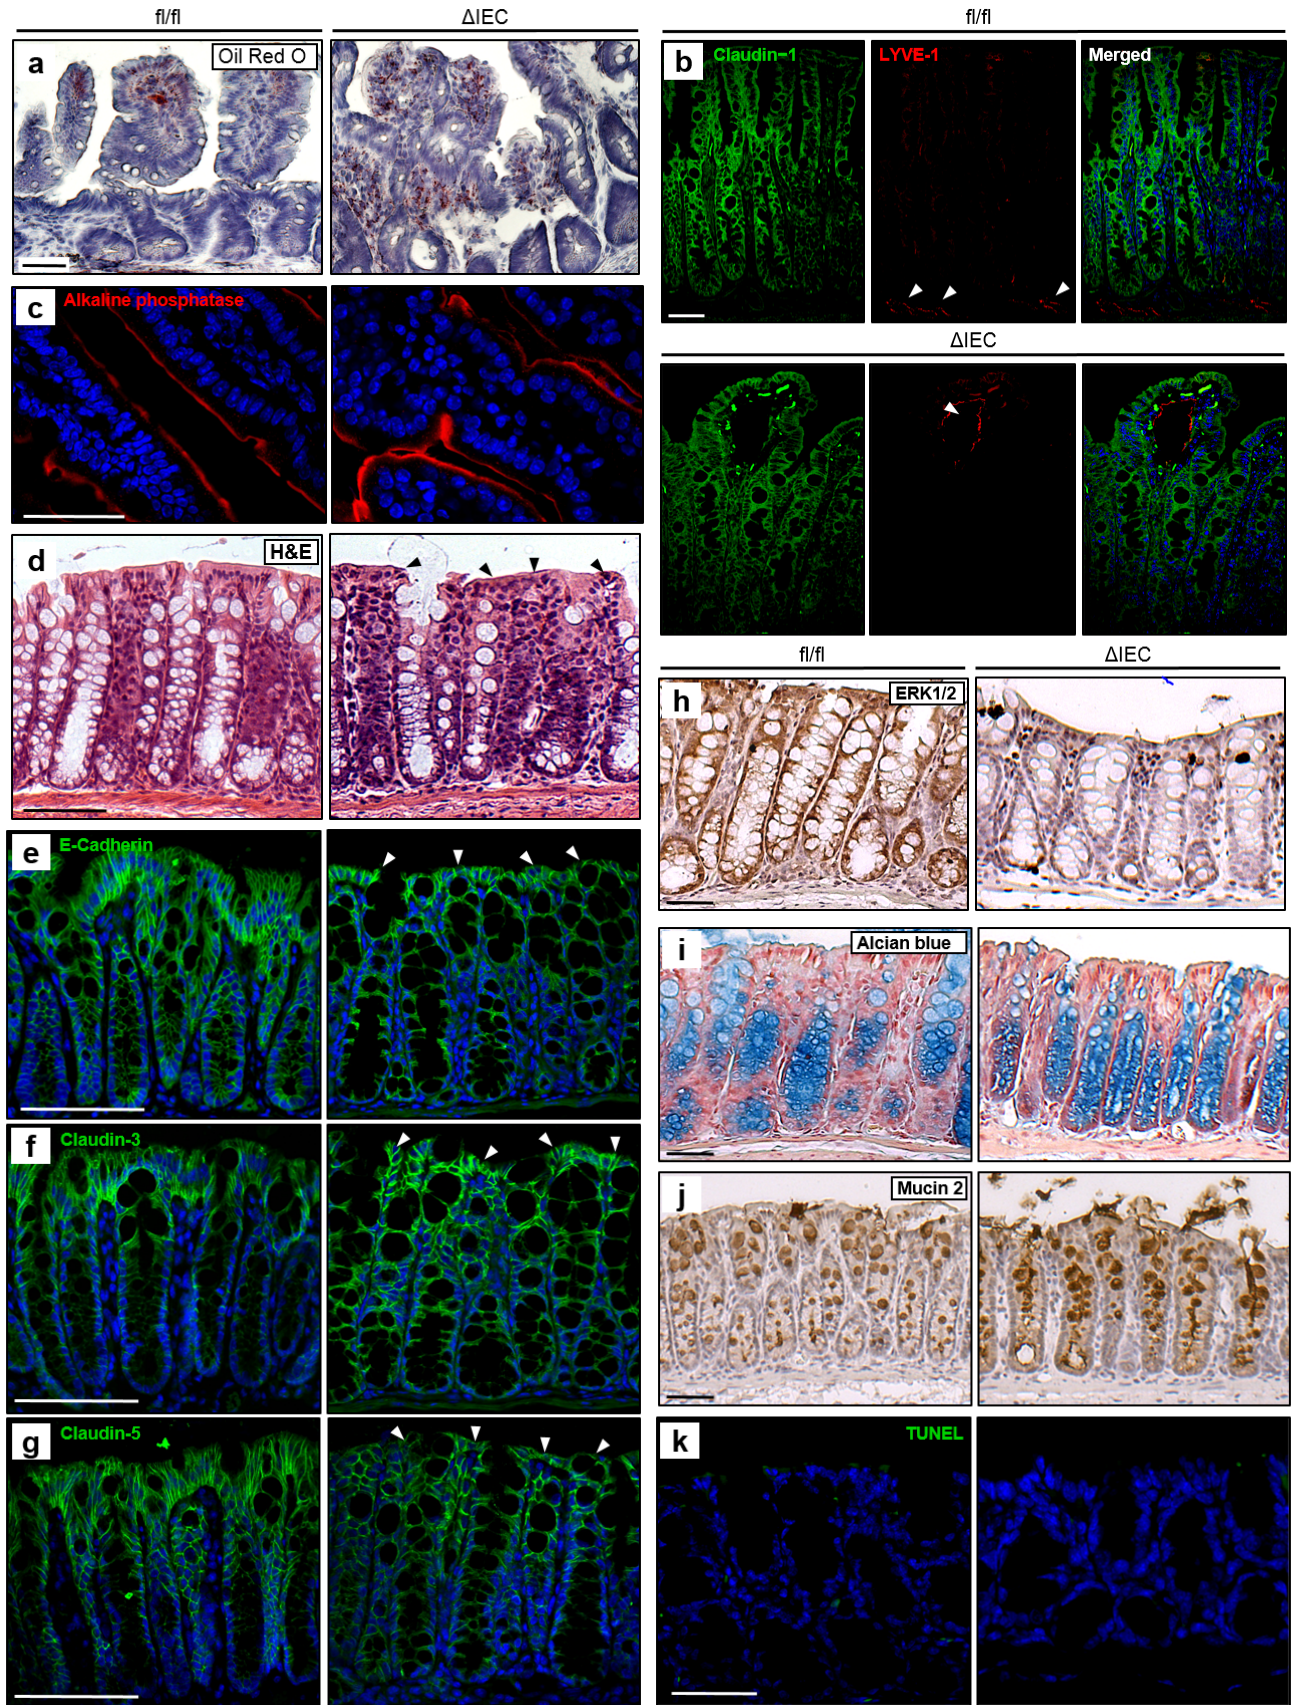

**Supplementary Fig. 3. Intestinal abnormalities in *Erk1/2* <sup>$\Delta$ IEC</sup> mice.**

**a-k**, Comparisons of small intestine (ileum) and colon sections from fl/fl and  $\Delta$ IEC mice 10 days after tamoxifen treatment. **(a)** Lipid staining with Oil red O of frozen sections from small intestine prepared from fl/fl and  $\Delta$ IEC mice. Counter staining with hematoxylin. **(b)** Immunofluorescent staining of paraffin-embedded sections from the small intestine for a lymphatic endothelial cell marker, lymphatic vessel endothelial hyaluronan receptor lymph marker (LYVE-1), and an IEC marker, Claudin-1. **(c)** Alkaline phosphatase staining of ileum sections from fl/fl and  $\Delta$ IEC mice. **(d)** Gross crypt architecture in colon sections prepared from fl/fl and  $\Delta$ IEC mice (H&E staining). Immunofluorescent staining for adherens protein E-Cadherin **(e)**, and tight junction proteins Claudin-3 **(f)** or Claudin-5 **(g)**. Arrowheads indicate the loss of the flat, epithelial sheet in colons from  $\Delta$ IEC mice which is normally visible in fl/fl (control) mice. Immunohistochemical staining for ERK1/2 **(h)**, Alcian blue **(i)** or Mucin 2 **(j)** of colon sections from fl/fl and  $\Delta$ IEC mice. **(k)** TUNEL assay performed with colon sections from fl/fl and  $\Delta$ IEC mice. Scale bars = 50 **(k)** or 100  $\mu$ m **(a-j)**. Representative examples are shown.

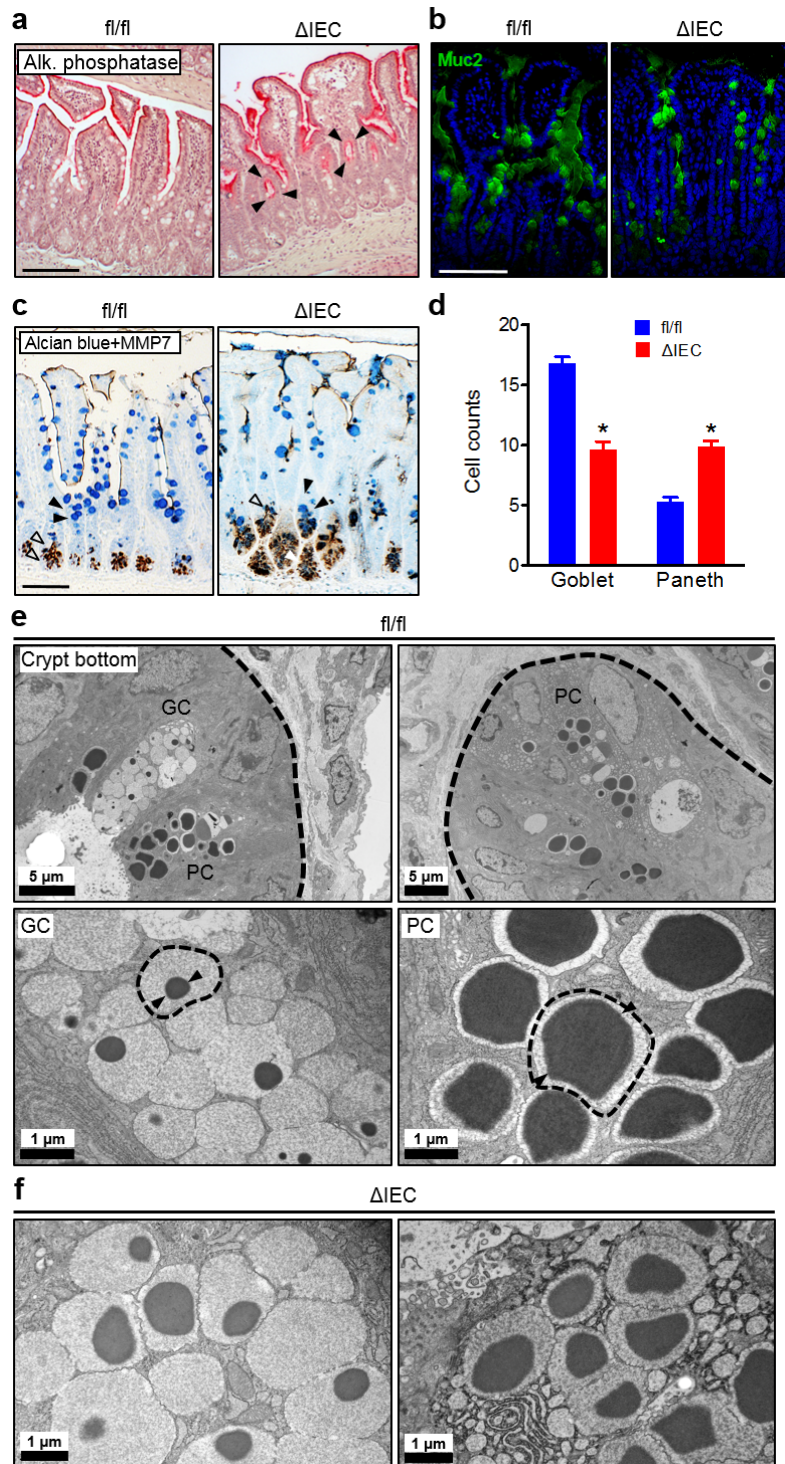

**Supplementary Fig. 4. Abnormal secretory cell differentiation in *Erk1/2* <sup>$\Delta$ IEC</sup> mice.**

Comparisons between fl/fl and  $\Delta$ IEC mice littermates performed at day 10 of follow-up after tamoxifen treatment. **a**, Alkaline phosphatase staining of paraffin-embedded ileum sections. Representative results are shown. **b**, Immunofluorescent staining of paraffin-embedded ileum sections for Muc2. Analysis by

fluorescence microscopy. **c**, Immunohistochemical staining of ileum sections with Alcian blue and anti-MMP7 antibodies, detected with DAB (brown). Open arrowheads indicate MMP7 positive cells at the crypt base; closed arrowheads indicate the most proximal Alcian blue positive staining cells along the crypt-villus axis. **d**, Enumeration of goblet and Paneth cells (per crypt-villus unit) by semi-quantitative, blinded scoring in ileum sections from fl/fl and  $\Delta$ IEC mice (n=3 for each condition). Data are mean  $\pm$  s.e.m. \* $P$ <0.05 by Student's *t* test. **e**, Top panels: visualization of cells residing in the crypt bottom in fl/fl mice by using transmission electron microscopy (TEM). Crypt outlines are indicated by dashed lines in top two panels (4000 $\times$  and 3150 $\times$  magnification, respectively). Bottom panels: high magnification images of a typical goblet (GC) and Paneth cell (PC) found in fl/fl mice. Dashed lines indicate granules, arrowheads indicate typical electrodense cores observed in mature cells (20000 $\times$  magnification, TEM). **f**, Representative examples of the abnormal features of goblet cells and Paneth cells, respectively, typically found in  $\Delta$ IEC mice. Scale bars = 100  $\mu$ m (**a-c**), or as indicated (**e-f**).

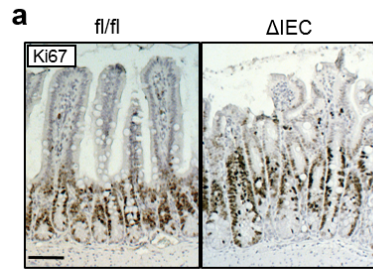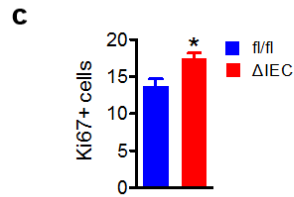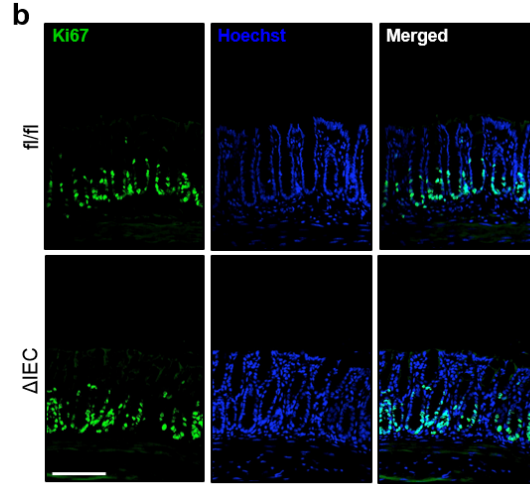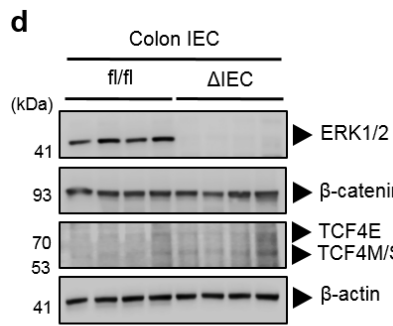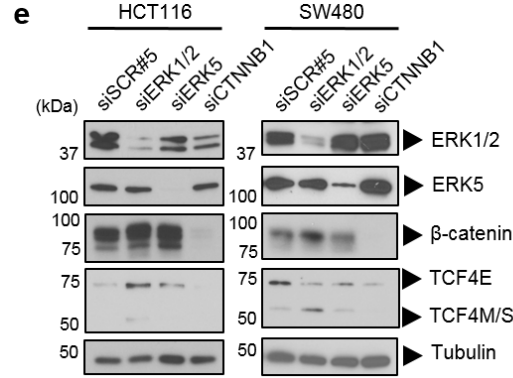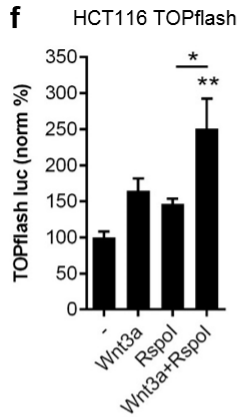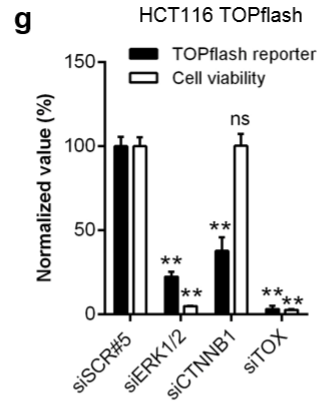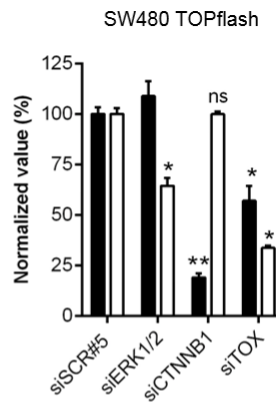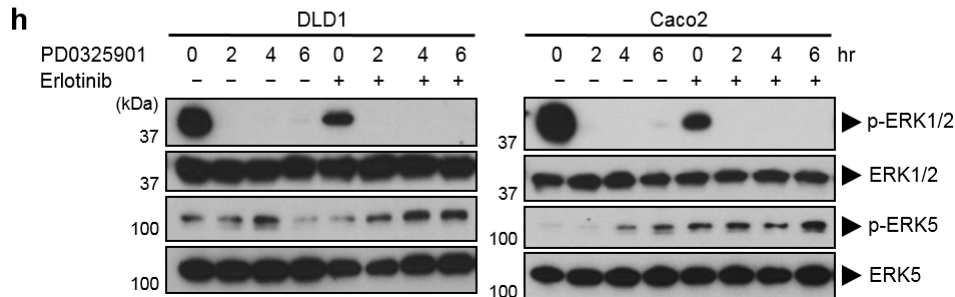



**Supplementary Fig. 5. *Erk1/2<sup>ΔIEC</sup>* mice display a hyperproliferative phenotype.**

**a**, Immunohistochemical staining with paraffin-embedded ileum sections from fl/fl and  $\Delta$ IEC mice, 10 days after tamoxifen treatment, for Ki67. Counter staining with hematoxylin. **b**, Immunofluorescent staining with paraffin-embedded colon sections from fl/fl and  $\Delta$ IEC mice, as in **a**, for Ki67. **c**, Enumeration of the number of Ki67 positive cells (per crypt) in the colons of fl/fl and  $\Delta$ IEC mice, respectively (n=3/group). Data are mean  $\pm$  s.e.m. \* $P$ <0.05 by Student's  $t$  test. **d**, Colon IEC were isolated from tamoxifen-treated fl/fl and  $\Delta$ IEC mice at day 10 of follow-up. Total cell lysates were analyzed by Western blotting for ERK1/2,  $\beta$ -catenin, TCF4 and  $\beta$ -actin. Representative results of three independent experiments. **e**, CRC cell lines HCT116 and SW480 were treated with siSCR#5 (non-targeting Control siRNA #5), siERK1/2, siERK5 or siCTNNB1 (40 nM) for 72 hr. Whole cell lysates were analyzed by Western blotting for abundance of ERK1/2, ERK5,  $\beta$ -catenin, TCF4 and Tubulin. **f**, SW480 and HCT116 cell lines were co-transfected with TOPflash and pcDNA3.1(+) plasmids and selected with Geneticin. To validate the specificity of reporter activity, HCT116 TOPflash cells were treated with Wnt3a ligand (100 ng/mL) and/or R-spondin 1 (Rspo1) conditioned media (20% v/v) for 24 hr, followed by cell viability and luciferase assays. Data are mean  $\pm$  s.e.m. \* $P$ <0.05 or \*\* $P$ <0.01 vs. control, or as indicated, by ANOVA. **g**, HCT116 and SW480 TOPflash reporter lines were treated with 40 nM siSCR#5 (non-targeting Control siRNA #5), siERK1/2, siCTNNB1 or siCONTROL TOX for 72 hr, after which luciferase activity and cell viability (XTT assay) were measured. Data are mean  $\pm$  s.e.m. \* $P$ <0.05 or \*\* $P$ <0.01 vs. siSCR#5, by ANOVA. **h**, DLD1 and Caco2 cells were treated with the specific MEK1/2 inhibitor, PD0325901 (100 nM), for 0, 2, 4 or 6 hr with or without the EGFR inhibitor, erlotinib (10  $\mu$ M). Cell lysates were analyzed by immunoblotting for indicated proteins. Scale bars = 100  $\mu$ m (**a**, **b**).

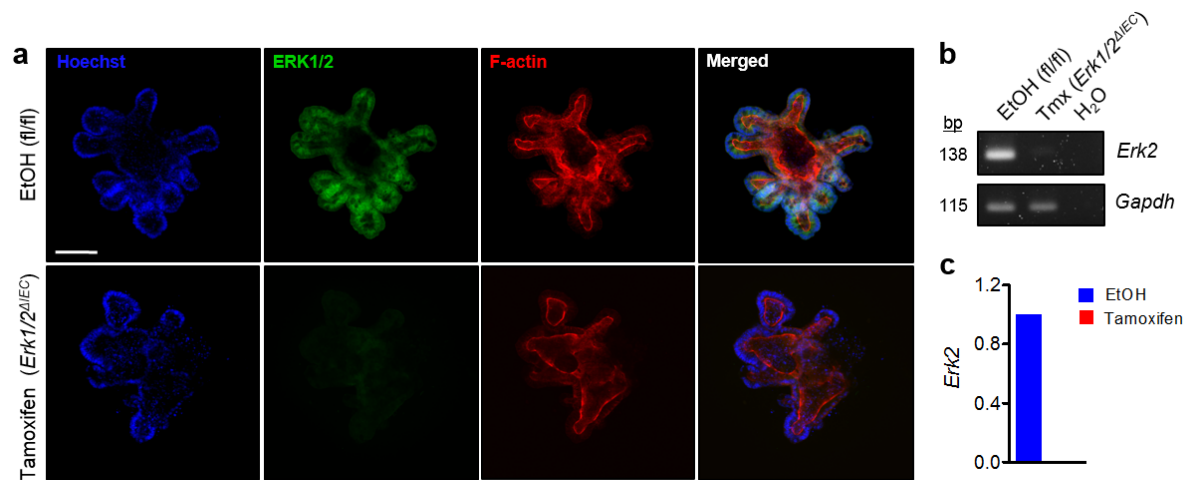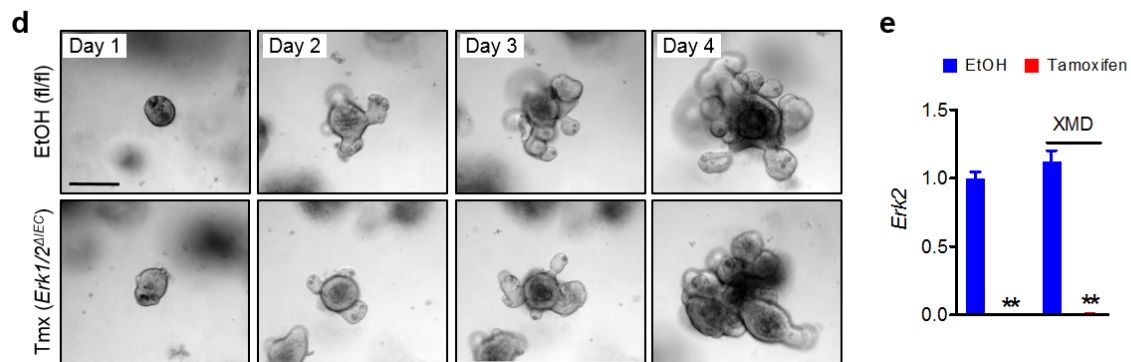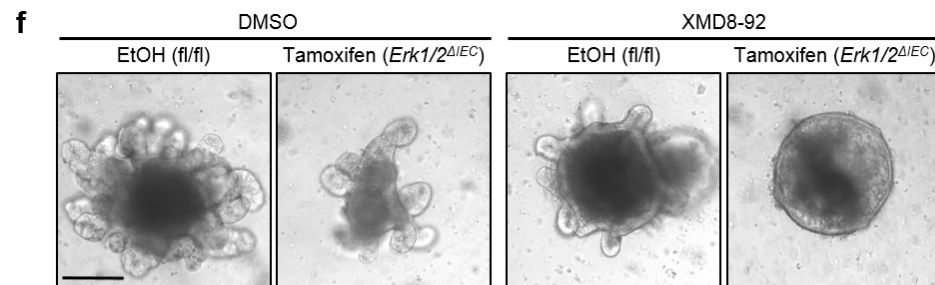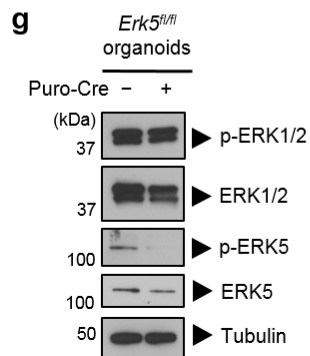

**Supplementary Fig. 6. Genetic deletion of *Erk1/2* or *Erk5* in intestinal organoids.**

**a**, Full images of intestinal organoids generated from  $\Delta$ IEC mice and treated with EtOH or tamoxifen (0.5  $\mu$ M), as shown in **Fig. 4a**. **b, c**, Analysis of *Erk2* transcript levels in  $\Delta$ IEC organoids after EtOH or tamoxifen (0.5  $\mu$ M) treatment. Q-PCR products were visualized by gel electrophoresis together with *Gapdh* (**b**). Quantification of *Erk2* expression in fl/fl and  $\Delta$ IEC organoids by Q-PCR, normalized for *Gapdh* (**c**). **d**, Budding, growth and morphological characteristics of fl/fl and  $\Delta$ IEC organoids after *ex vivo* treatment with EtOH or tamoxifen (0.5  $\mu$ M) on day 1 and 2. **e, f**,  $\Delta$ IEC organoids were treated with EtOH or tamoxifen (0.5  $\mu$ M), with or without co-treatment with the ERK5 inhibitor, XMD8-92 (10  $\mu$ M), respectively. Treatment was started 2 days after organoid passing for 2 consecutive days. Organoids were analyzed on day 5 of culture. Analysis of *Erk2* transcript expression by Q-PCR (n=2-3/group) with organoid lysates, normalized for *Gapdh* (**e**). Data are mean  $\pm$  s.e.m. \*\* $P$ <0.01 versus control (EtOH) or as indicated, by ANOVA. Intestinal organoids with or without co-treatment were imaged by live-cell brightfield microscopy (**f**). **g**, Intestinal organoids generated from *Erk5<sup>fl/fl</sup>* mice were transduced with Puro-Cre lentivirus (empty vector). Transduced organoids were then selected with puromycin for 7 days. Whole cell lysates were prepared and analyzed by Western blotting for p-ERK1/2, ERK1/2, p-ERK5, ERK5 and Tubulin. Representative results of two independent experiments. Scale bars = 100  $\mu$ m (**a, d, f**).

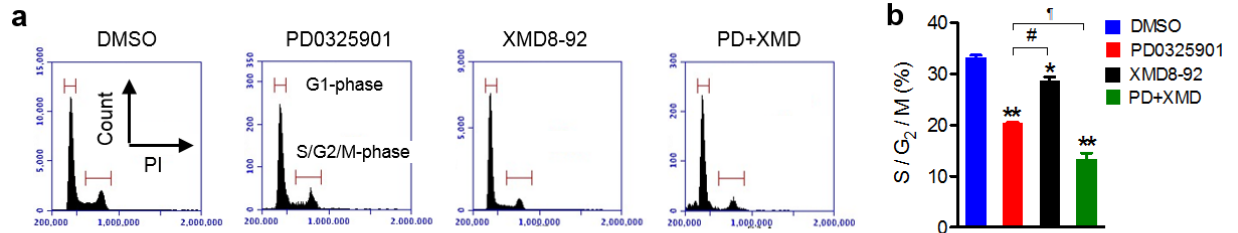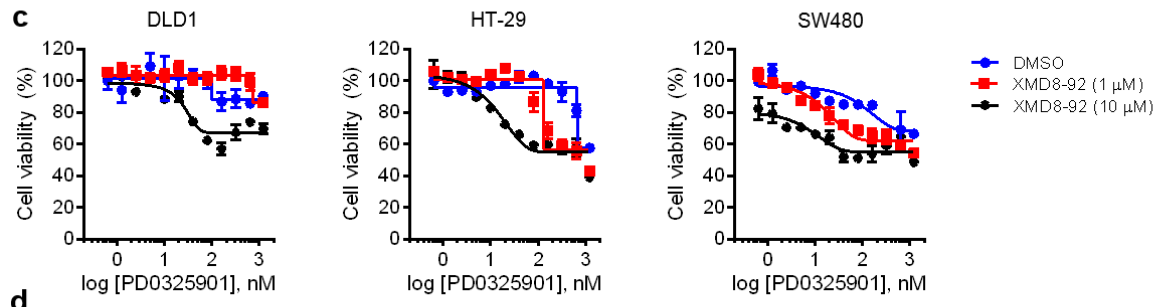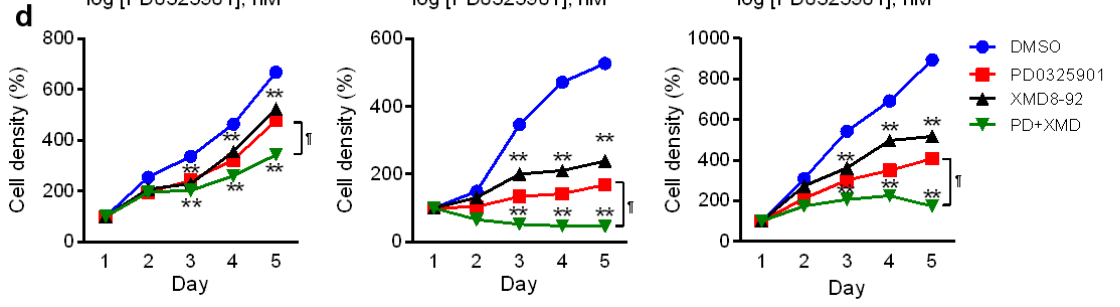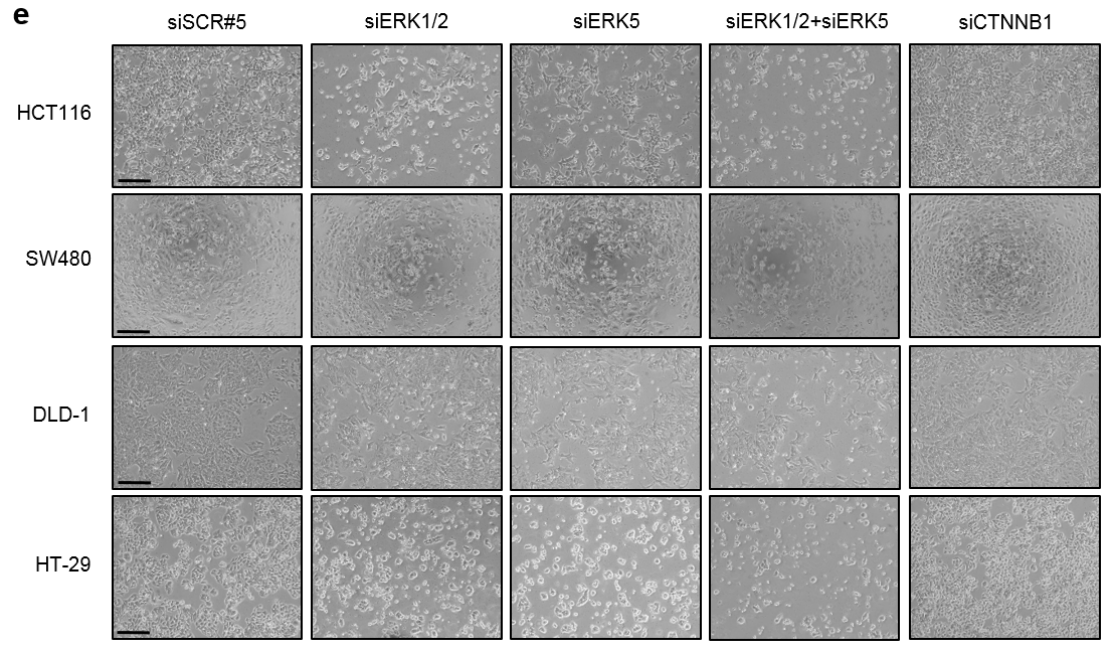

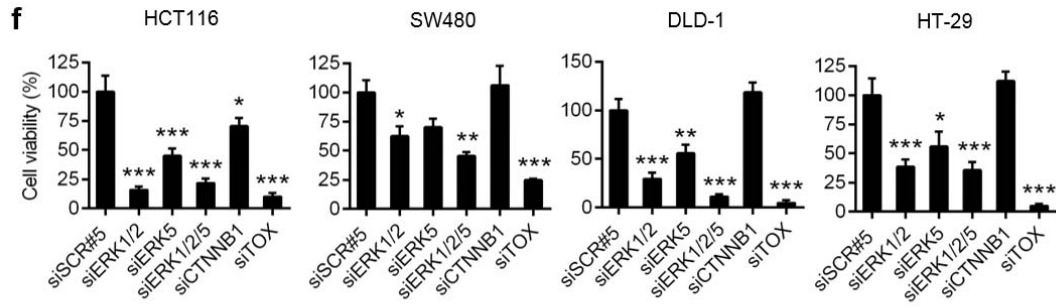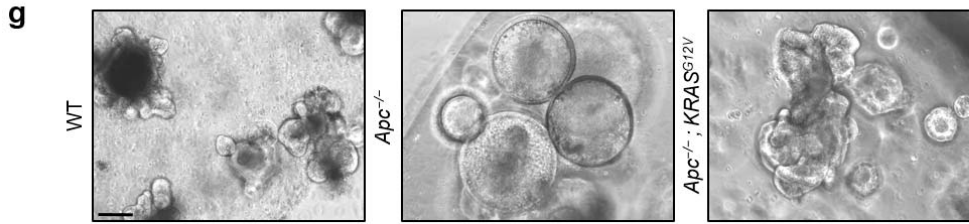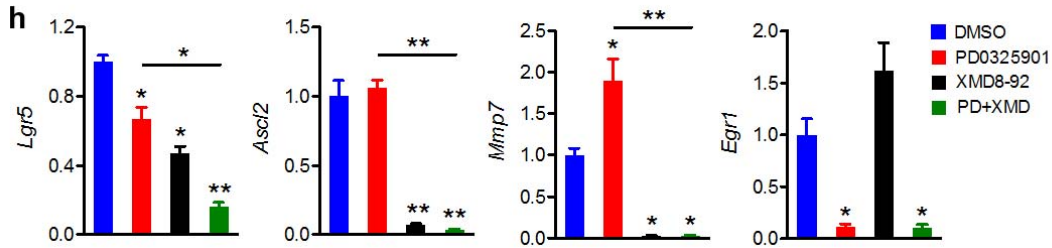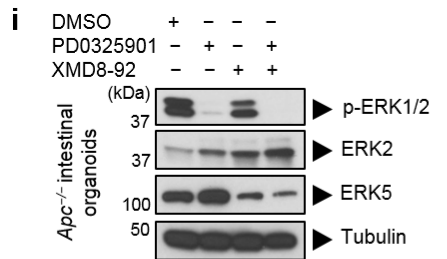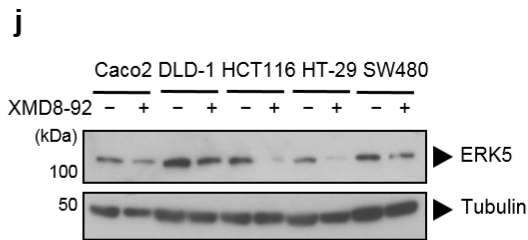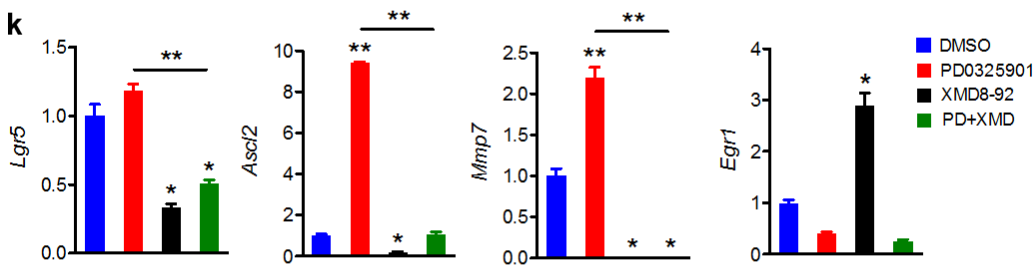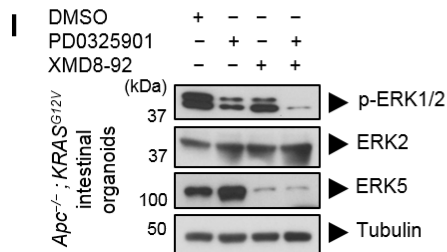

**Supplementary Fig. 7. Dual inhibition of ERK1/2 and ERK5 inhibits intestinal tumor cell proliferation.**

**a, b**, HCT116 cells were treated with DMSO, PD0325901 (100 nM), XMD8-92 (10  $\mu$ M) or PD0325901 (100 nM) + XMD8-92 (10  $\mu$ M), stained with propidium iodide 24 hr later and analyzed by flow cytometry. Representative examples of propidium iodide staining of HCT116 cells after treatment with pharmacological inhibitors (**a**). Quantification of cells in S-phase, G2 or M-phase in each experimental condition (n=3/condition) (**b**). **c**, DLD1, HT-29 and SW480 cells were plated at  $5 \times 10^3$  cells/well and treated with PD0325901 (0.63, 1.25, 2.5, 5, 10, 20, 40, 80, 160, 320, 640 or 1280 nM) with or without XMD8-92 (0, 1, or 10  $\mu$ M). Cell viability was assessed by XTT assay after 48 hr of treatment. **d**, DLD1, HT-29 and SW480 cells were plated at  $2 \times 10^3$  cells/well and cultured in the presence of DMSO, PD0325901 (100 nM), XMD8-92 (10  $\mu$ M) or PD0325901 (100 nM) + XMD8-92 (10  $\mu$ M). Compounds were added on day 0 and day 2. XTT assay was performed on five consecutive days. Results are normalized to cell densities on day 1 (n=8/condition). **e, f**, CRC cell lines HCT116, SW480, DLD-1 and HT-29 were treated with 40 nM siSCR#5, siERK1/2, siERK5, siERK1/2+siERK5, siCTNNB1 or siTOX. Cell viability was measured after 72 hr by XTT assay. Representative light cell microscopy pictures of corresponding cell cultures Scale bars = 200  $\mu$ m (**e**). Quantification of cell viability by XTT assay (**f**). **g**, Left two panels: Morphological characteristics of small intestinal organoids generated from wild-type mice, or *Apc<sup>fl/fl</sup>* mice and transduced *ex vivo* with Adeno-Cre (*Apc<sup>-/-</sup>*), respectively. Right panel: Morphological features of *Apc<sup>-/-</sup>* organoids that were transduced with *KRAS<sup>G12V</sup>* expressing lentivirus *ex vivo*. Organoids were visualized by live-cell brightfield microscopy on day 5 after passage. Scale bar = 100  $\mu$ m. **h, i**, Intestinal organoids generated from *Apc<sup>-/-</sup>* mice were treated with DMSO, PD0325901 (20 nM), XMD8-92 (10  $\mu$ M) or PD0325901 (20 nM) + XMD8-92 (10  $\mu$ M) for 5 days. Organoid cell lysates were analyzed by Q-PCR (n=3/condition) for intestinal stem cell markers, *Lgr5* and *Ascl2*, the Paneth cell marker, *Mmp7*, and the immediate-early gene, *Egr1* (**h**). Protein samples were analyzed by immunoblotting for indicated proteins (**i**). **j**, Immunoblotting of protein samples isolated from CRC lines Caco2, DLD-1, HCT116, HT-29 and SW480 after treatment with DMSO or XMD8-92 (10  $\mu$ M) for 3 days. **k, l**, Intestinal organoids generated from *Apc<sup>-/-</sup>* mice were transduced with *KRAS<sup>G12V</sup>* expressing lentivirus, and treated with DMSO, PD0325901 (20 nM), XMD8-92 (10  $\mu$ M) or PD0325901 (20 nM) + XMD8-92 (10  $\mu$ M) for 5 days. Organoid cell lysates were analyzed by Q-PCR (n=3/condition) as in **h** (**k**), protein samples were analyzed by immunoblotting for indicated proteins (**l**). Data are mean  $\pm$  s.e.m. \**P*<0.05, \*\**P*<0.001 versus DMSO or as indicated (**b, h, k**), # *P*<0.01 for XMD8-92 versus PD0325901 (**b**), ¶ *P*<0.01 for PD0325901 versus PD+XMD (**b, d**), \**P*<0.05, \*\**P*<0.01 or \*\*\**P*<0.001 vs. siSCR#5 (**f**), by ANOVA.

**Supplementary Fig. 8. Full original immunoblots and gel images.**

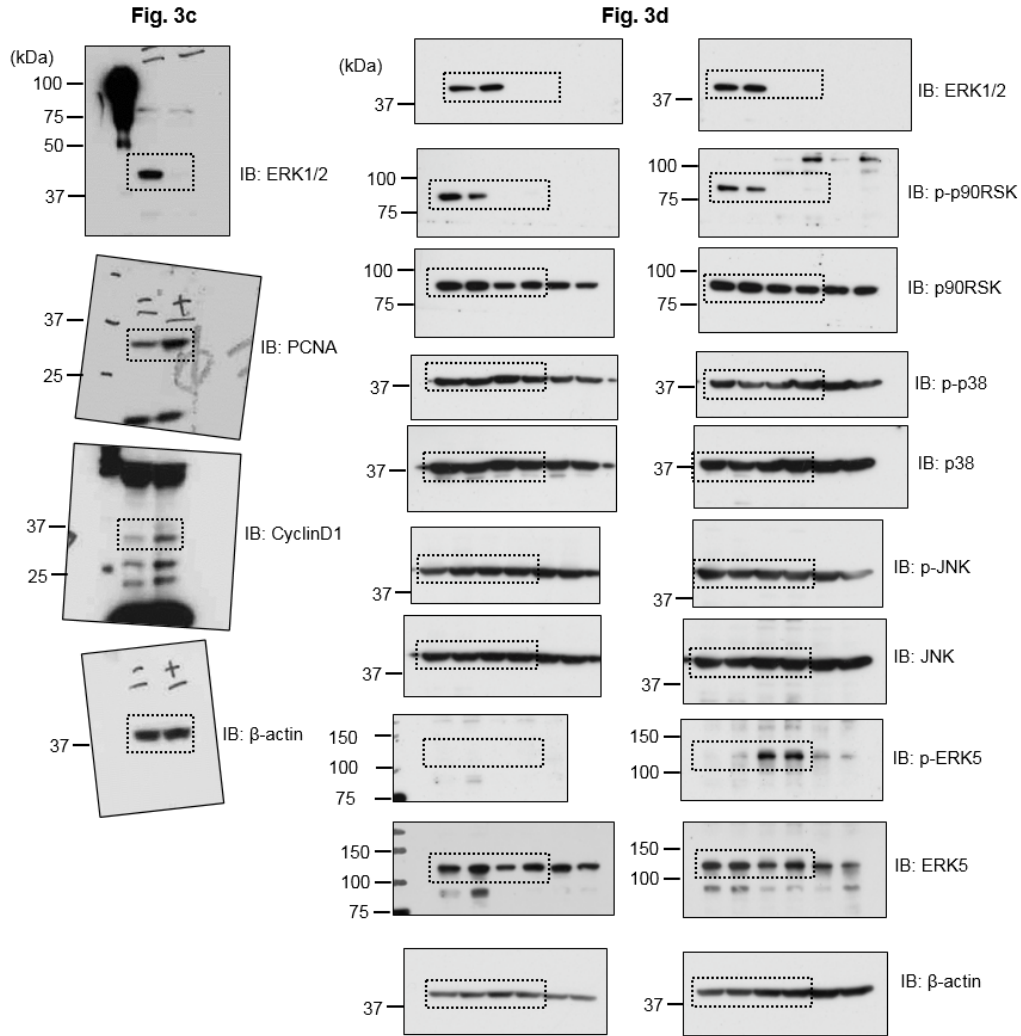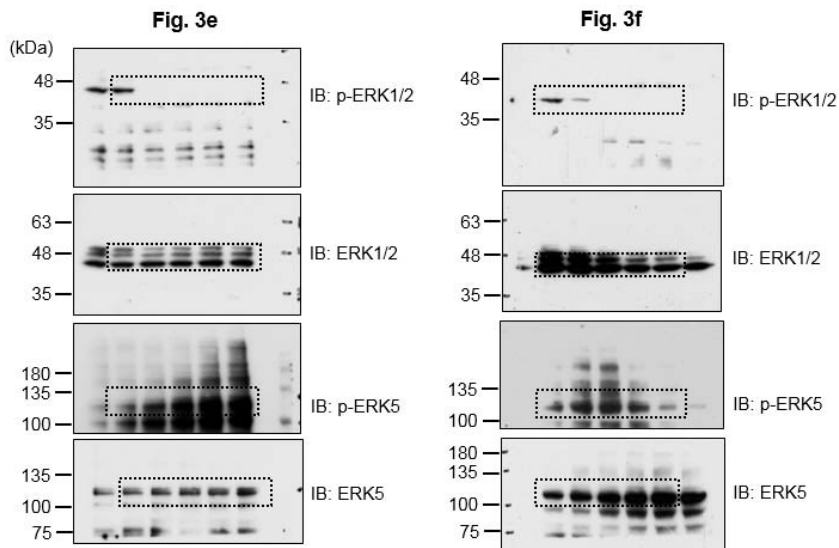

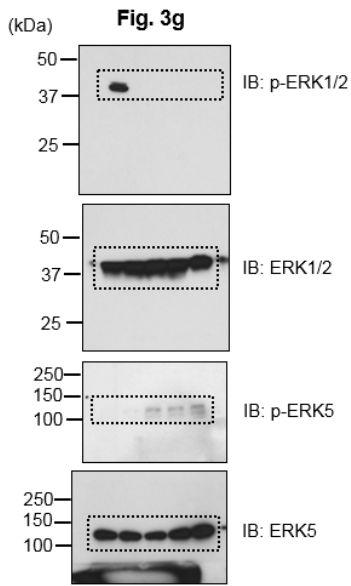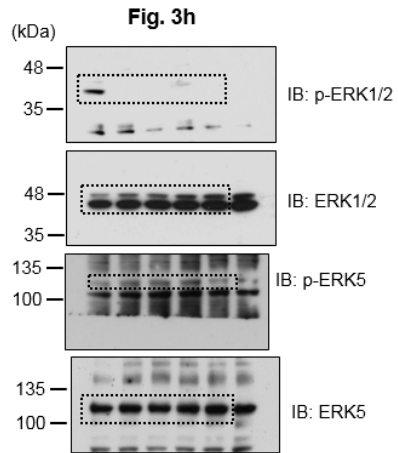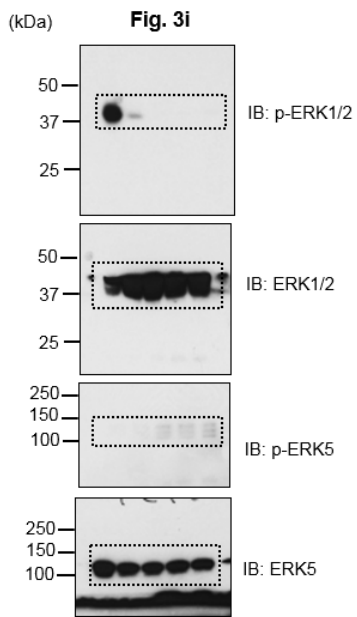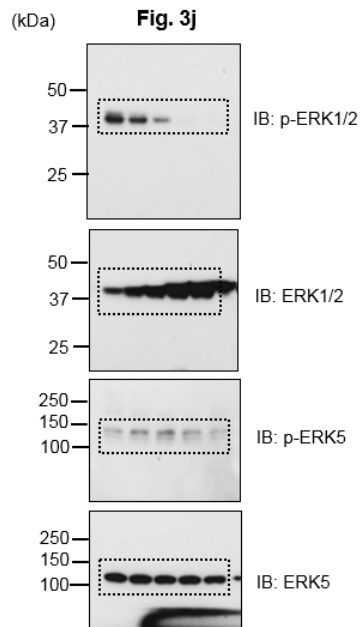



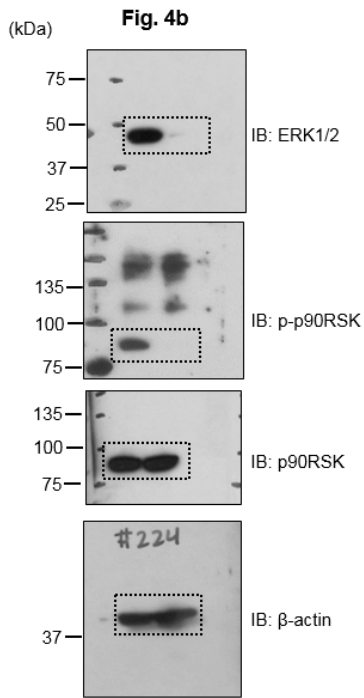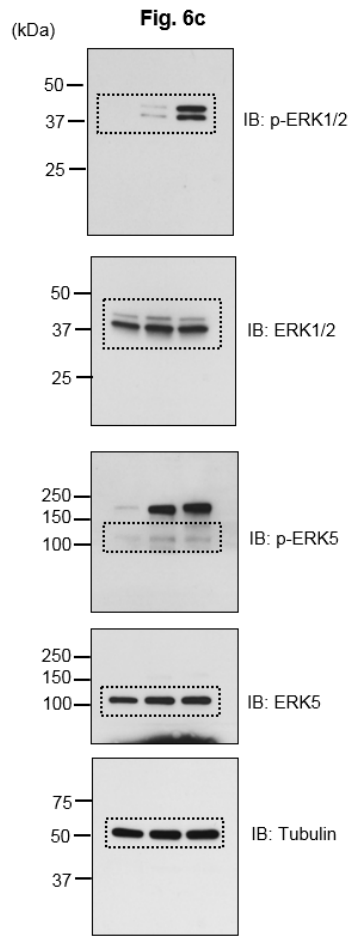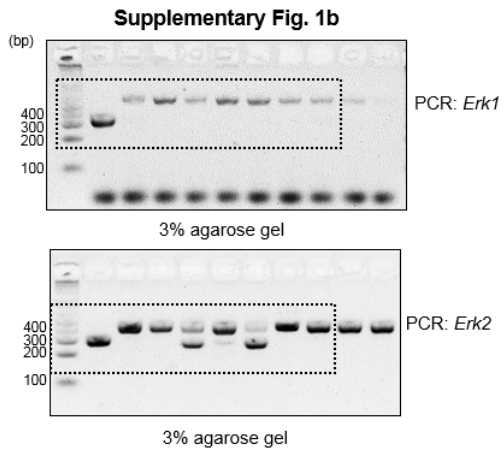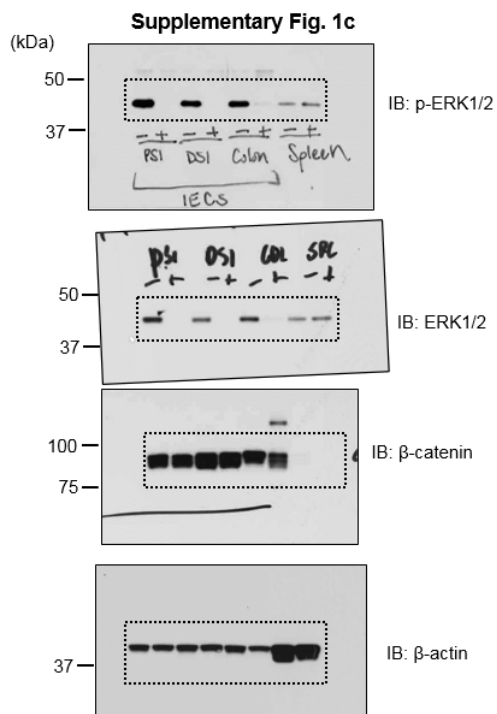

**Supplementary Fig. 5d**

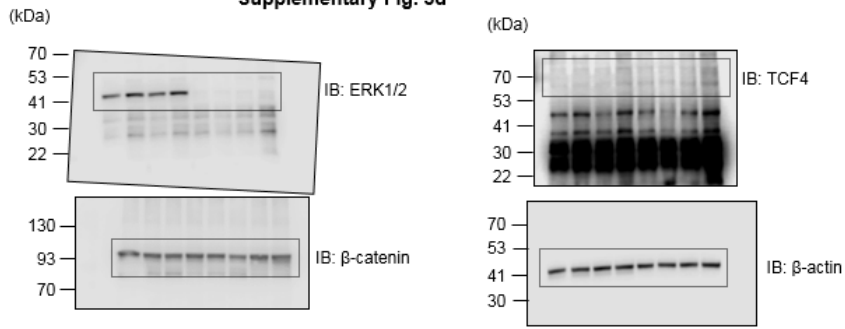

**Supplementary Fig. 5e**

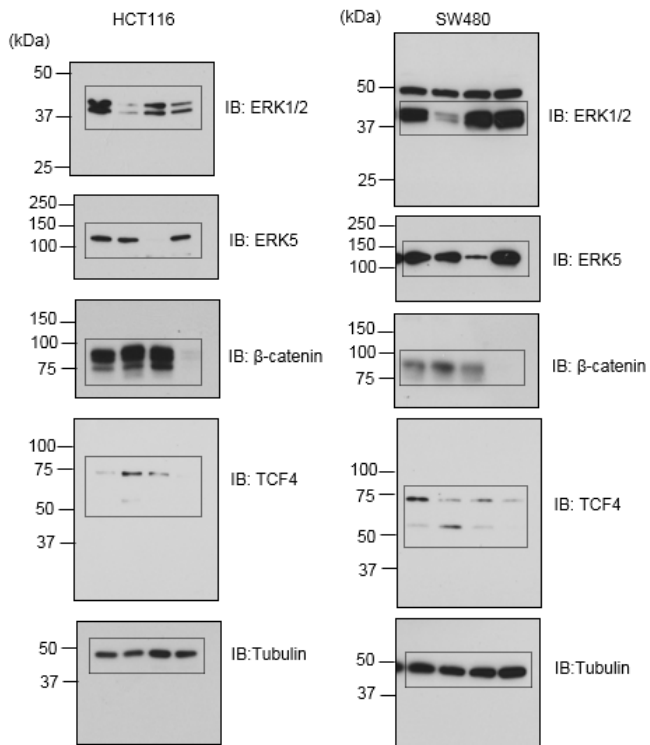

**Supplementary Fig. 5h**

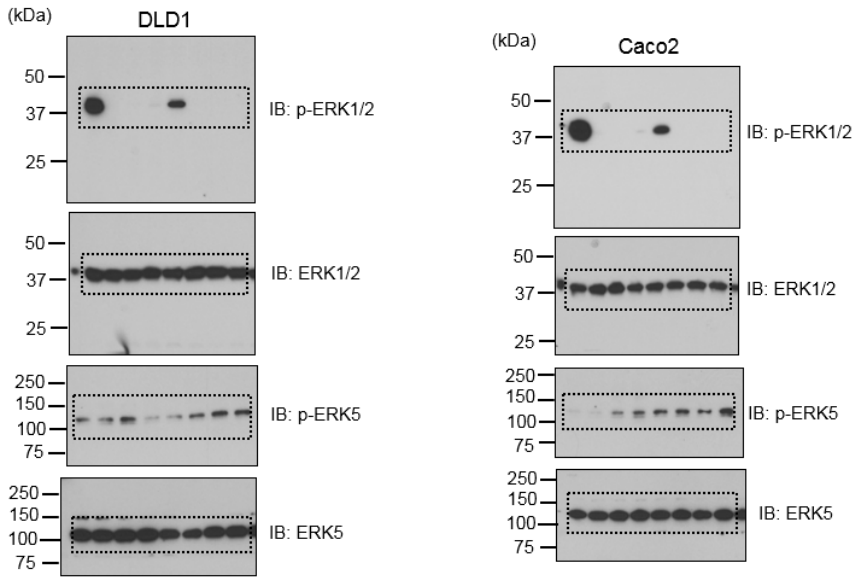

**Supplementary Fig. 6b**

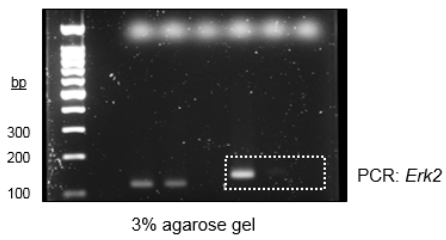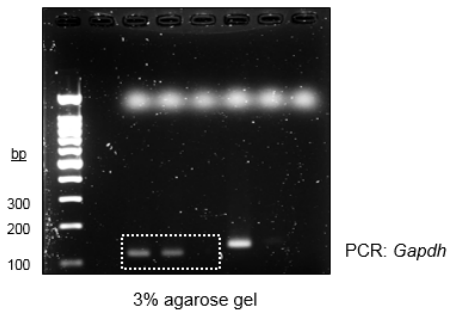

**Supplementary Fig. 6g**

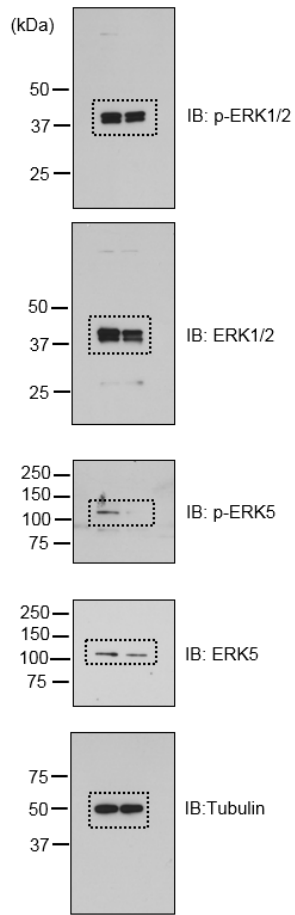

**Supplementary Fig. 7i**

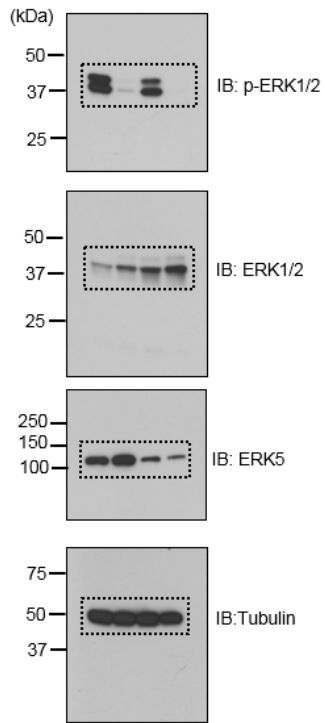

**Supplementary Fig. 7i**

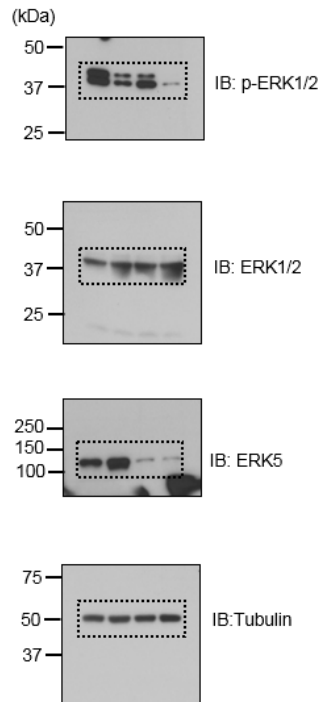

**Supplementary Fig. 7j**

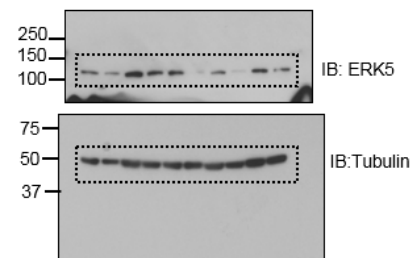

**Supplementary Table 1. Primer sequences.**

| <b>Gene</b>         | <b>Accession number(s)</b>                                                          | <b>Sequence 5'-3'</b>                                |
|---------------------|-------------------------------------------------------------------------------------|------------------------------------------------------|
| <i>18S rRNA</i>     | X00686.1                                                                            | TTGACGGAAGGGCACCACCAG<br>GCACCACCACCCACGGAATCG       |
| <i>Ascl2</i>        | NM_008554                                                                           | CCGGAGCATGGAAGCACACCTTG<br>AGGACTCCCTAGGGCACGCG      |
| <i>c-Fos</i>        | NM_010234.2                                                                         | ACCATGATGTTCTCGGGTTTC<br>GCTGGTGGAGATGGCTGTAC        |
| <i>c-Myc</i>        | NM_001177353.1<br>NM_010849.4                                                       | TGGTGTCTGTGGAGAAGAGGCAAA<br>TTGGCAGCTGGATAGTCCTTCCTT |
| <i>Egr1</i>         | NM_007913                                                                           | GTGTGCCCTCAGTAGCTTC<br>GACATCAATTGCATCTCGGC          |
| <i>Fra1 (Fosl1)</i> | NM_010235.2                                                                         | CCCTACCGAACATCCAGC<br>TTGGCACAAGGTGGA ACT            |
| <i>Gapdh</i>        | NM_001289726.1<br>NM_008084.3                                                       | TCAACAGCAACTCCC ACTCTT<br>ACCCTGTTGCTGTAGCCGTAT      |
| <i>Lgr5</i>         | NM_010195.2                                                                         | TGAGCGGGACCTTGAAGATTCCT<br>AGCCAGCTACCAAATAGGTGCTCA  |
| <i>Mapk1 (Erk2)</i> | NM_011949.3<br>NM_001038663.1                                                       | TGCGCTTCAGACATGAGAAC<br>TGAGGTGCTGTGTCTTCAAG         |
| <i>Mapk7 (Erk5)</i> | NM_011841.2<br>NM_001291033.1<br>NM_001291034.1<br>NM_001291035.1<br>NM_001291036.1 | TCAAAGCTGCCCTGCTCAAG<br>TCTCTTCTCGTTCTCGCTGG         |
| <i>Mki67</i>        | NM_001081117.2                                                                      | TGCCCCGACCCTACAAAATG<br>GAGCCTGTATCACTCATCTGC        |
| <i>Mmp7</i>         | NM_010810.4                                                                         | AACACTCTAGGTCATGCCTTCGCA<br>AGACCCAGAGAGTGGCCAAA     |
